# Supplementary material
Source: Springer Nature journal article supplement (https://www.springermedizin.de/resource/supplementary/12911_2012_621_MOESM1_ESM.pdf/9525874)

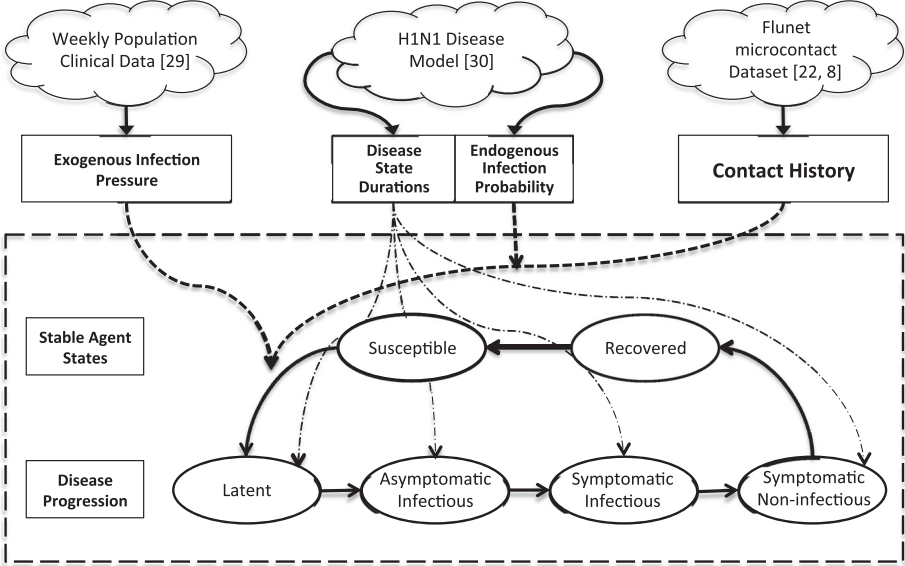

Supplement: MOESM1 [file 9525874]
